# Supplementary material
Source: Springer Nature journal article supplement (https://mijn.bsl.nl/resource/supplementary/13047_2012_466_MOESM1_ESM.pdf/7111566)

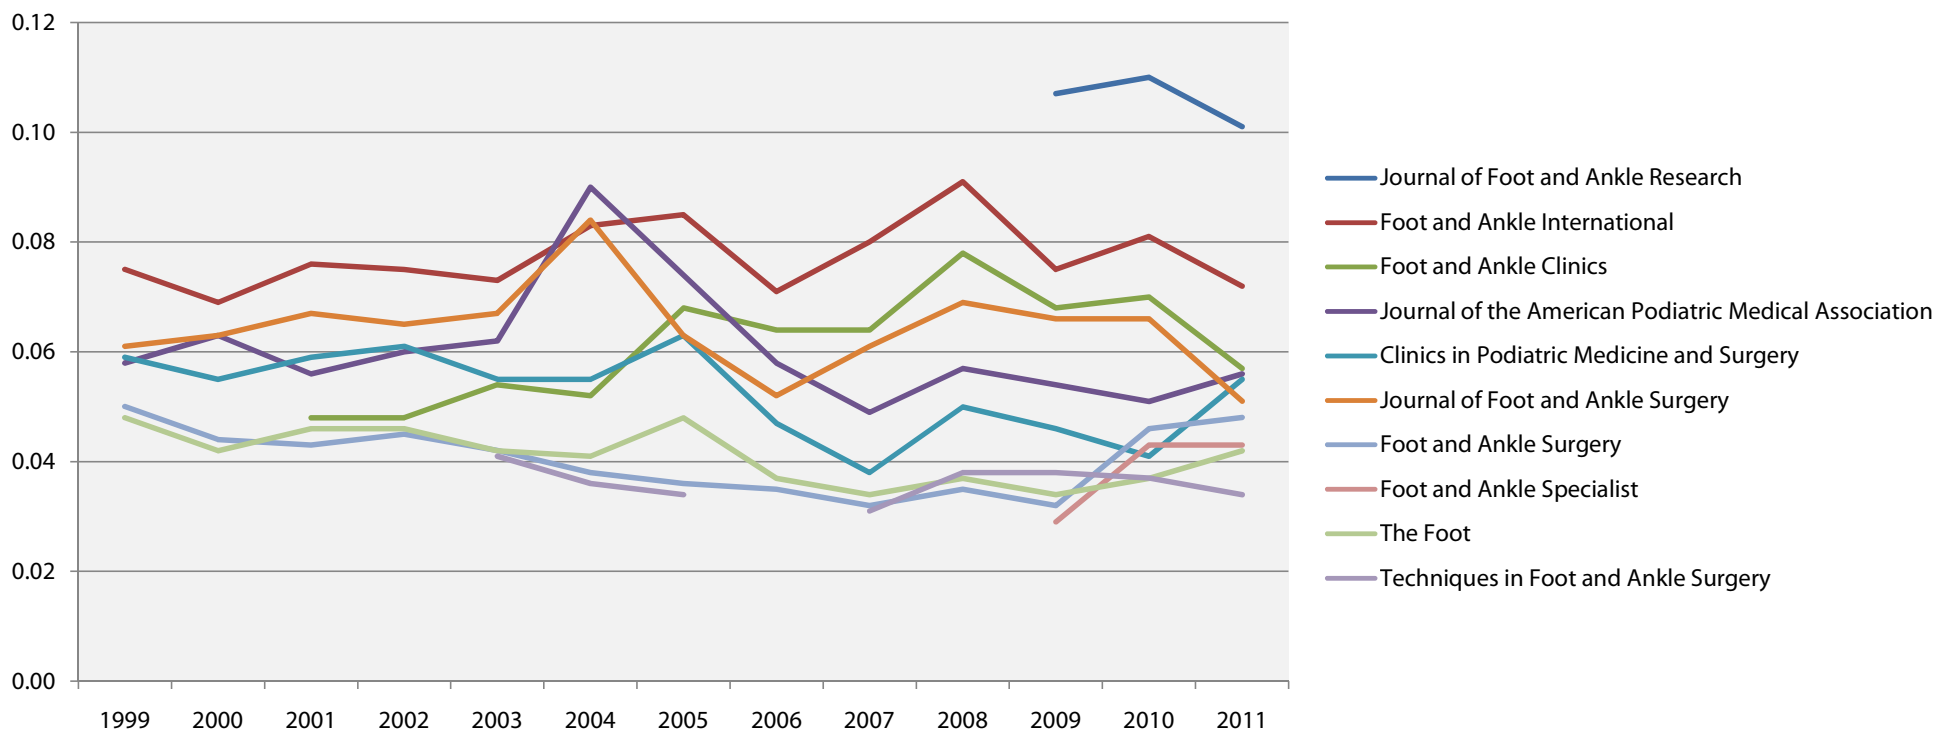

Supplement: MOESM1 [file 7111566]
